# Supplementary material for: Accurate Receptor-Ligand Binding Free Energies from Fast QM Conformational Chemical Space Sampling
Source: PubMed Central journal article supplement (PMC8002627; doi:10.3390/ijms22063078), 2021-03-17
Supplement: ijms-22-03078-s001.pdf [file ijms-22-03078-s001.pdf]

## Supplementary Information

# Accurate Receptor-Ligand Binding Free Energies from Fast QM Conformational Chemical Space Sampling

Esra Boz<sup>1</sup>, Matthias Stein<sup>1,\*</sup>

<sup>1</sup> Max Planck Institute for Dynamics of Complex Technical Systems, Molecular Simulations and Design Group, Sandtorstrasse 1, 39106 Magdeburg, Germany; boz@mpi-magdeburg.mpg.de; matthias.stein@mpi-magdeburg.mpg.de

\* Correspondence: matthias.stein@mpi-magdeburg.mpg.de

**Table S1:****Table S1.** Typical CREST settings

|                                              |                               |                                  |  |
|----------------------------------------------|-------------------------------|----------------------------------|--|
| T /K                                         | 298.15                        |                                  |  |
| Constrain force constant                     | 0.5                           |                                  |  |
| Wall potential:                              | ellipsoidal, polynomial       |                                  |  |
| list of $V_{\text{bias}}$ parameters applied | $V_{\text{bias}}$ prefactor k | $V_{\text{bias}}$ exponent alpha |  |
| Metadyn 1                                    | 0.00100                       | 1.000                            |  |
| Metadyn 2                                    | 0.00050                       | 1.000                            |  |
| Metadyn 3                                    | 0.00100                       | 0.500                            |  |
| Metadyn 4                                    | 0.00050                       | 0.500                            |  |
| Metadyn 5                                    | 0.00100                       | 0.250                            |  |
| Metadyn 6                                    | 0.00050                       | 0.250                            |  |

**Table S2.** Number of unique structures in the conformer-rotamer ensemble at each stage of the workflow (ligand-receptor complex/free ligand)

| CB[8] Ligands          | Number of Unique Structure in CRE of Complex/Ligand |                      |         |
|------------------------|-----------------------------------------------------|----------------------|---------|
|                        | CREST                                               | Tight reoptimization | Hessian |
| <b>G0<sup>2+</sup></b> | 16/12                                               | 10/12                | 8/12    |
| <b>G0<sup>+</sup></b>  | 33/11                                               | 17/11                | 12/9    |
| <b>G1</b>              | 63/11                                               | 22/11                | 21/11   |
| <b>G2</b>              | 155/175                                             | 149/175              | 137/158 |
| <b>G3</b>              | 4/5                                                 | 4/5                  | 4/5     |
| <b>G4</b>              | 8/4                                                 | 8/4                  | 8/4     |
| <b>G5</b>              | 10/9                                                | 10/9                 | 10/9    |
| <b>G6</b>              | 20/14                                               | 20/14                | 19/14   |
| <b>G7</b>              | 43/17                                               | 43/17                | 39/16   |
| <b>G8</b>              | 143/18                                              | 85/17                | 90/17   |
| <b>G9</b>              | 206/23                                              | 193/23               | 175/22  |
